# Supplementary material for: Differentially Expressed Genes and Signaling Pathways Potentially Involved in Primary Resistance to Chemo-Immunotherapy in Advanced-Stage Gastric Cancer Patients
Source: MDPI journal article supplement (doi:10.3390/ijms24010001), 2022-12-20
Supplement: s1 [file s1]

Cutoff:  $p < 0.001$   
53 differentially expressed genes

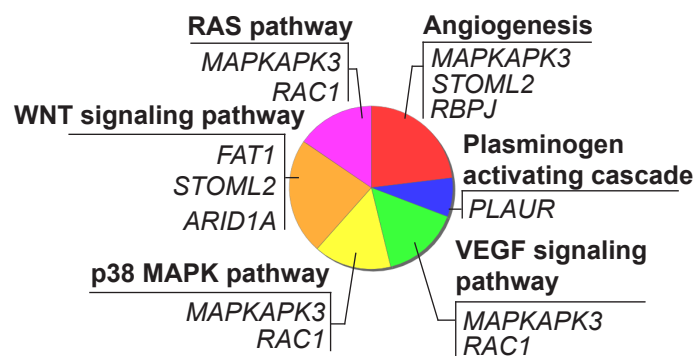

Supplementary Figure S1. Other enriched pathways in NR patients
