# Supplementary material for: Differentially Expressed Genes and Signaling Pathways Potentially Involved in Primary Resistance to Chemo-Immunotherapy in Advanced-Stage Gastric Cancer Patients
Source: MDPI journal article supplement (doi:10.3390/ijms24010001), 2022-12-20
Supplement: s1 [file s1]

**Supplementary Table S1.** Basic characteristics and clinically relevant alterations in NR patients (n=4)

|                      | <b>Patient 1</b>                                                                                                                                                                             | <b>Patient 2</b>                                                                                                                                                                               | <b>Patient 3</b>                                                                                                                                                                                                       | <b>Patient 4</b>                                                                                                                                                 |
|----------------------|----------------------------------------------------------------------------------------------------------------------------------------------------------------------------------------------|------------------------------------------------------------------------------------------------------------------------------------------------------------------------------------------------|------------------------------------------------------------------------------------------------------------------------------------------------------------------------------------------------------------------------|------------------------------------------------------------------------------------------------------------------------------------------------------------------|
| Age (yr), gender     | 47, female                                                                                                                                                                                   | 21, female                                                                                                                                                                                     | 27, female                                                                                                                                                                                                             | 49, male                                                                                                                                                         |
| Diagnosis            | Gastric carcinoma                                                                                                                                                                            | Gastric carcinoma                                                                                                                                                                              | Gastric carcinoma                                                                                                                                                                                                      | Gastric carcinoma                                                                                                                                                |
| Immuno response      | Non-responder                                                                                                                                                                                | Non-responder                                                                                                                                                                                  | Non-responder                                                                                                                                                                                                          | Non-responder                                                                                                                                                    |
| Type of biopsy       | Tissue                                                                                                                                                                                       | Tissue                                                                                                                                                                                         | Tissue                                                                                                                                                                                                                 | Tissue                                                                                                                                                           |
| Relevant alterations | <b>ARID1A</b><br>(c.6472C>T, p.Arg2158Ter)<br><br><b>PIK3CA</b><br>(c.3140A>G, p.His1047Arg)<br><b>ERBB2/HER2</b><br>(c.929C>T, p.Ser310Phe)<br><br><b>ESR1(2)-CCDC170(8)</b><br>gene fusion | <b>TP53</b><br>(c.159G>A, p.W53*)<br><br><b>PIK3CA</b><br>(c.1636C>A, p.Q546K)<br><b>SMAD4</b><br>(c.1054G>A, p.G352R)<br><br><b>PBRM1</b><br>(c.4132+1G>A)<br><b>CDK6</b><br>copy number gain | <b>TP53</b><br>(c.692_700dupCCATCCACT, p.H233_Y234insSIH)<br><b>PIK3R1</b><br>(c.328C>T, p.Q110*)<br><b>SMAD4</b><br>(c.904+1_904+2insGCCTGTTTCAATGAGCTTGCAATCCAGCCTCCCATTTCCAATCA)<br><b>TP53</b><br>copy number loss | <b>ARID1A</b><br>(c.1554C>G, p.Y518*)<br><br><b>TP53</b><br>(c.734G>T, p.G245V)<br><b>TP53</b><br>(c.578A>G, p.H193R)<br><br><b>APC</b><br>(c.3451G>T, p.E1151*) |
